# Supplementary material
Source: Springer Nature journal article supplement (https://www.springermedizin.de/resource/supplementary/13069_2008_5_MOESM6_ESM.pdf/9659588)
Supplement: MOESM6 [file 9659588]

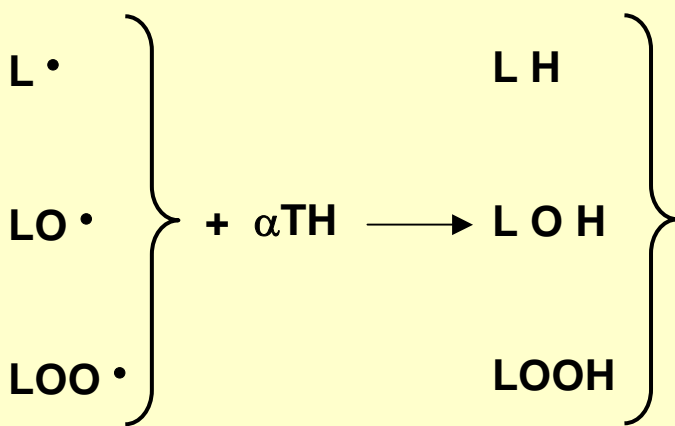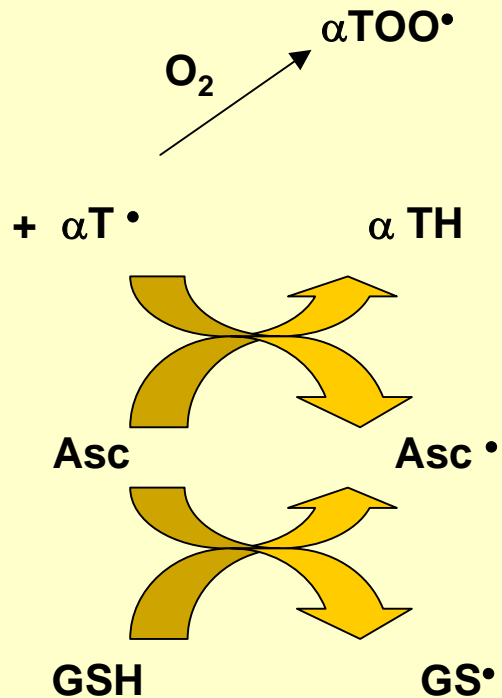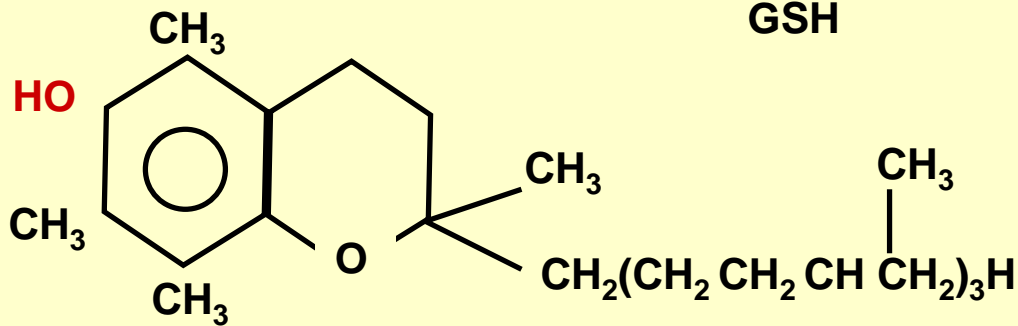

$\alpha$ -Tocopherol (vitamin E) or  $\alpha TH$

- $\alpha T \cdot$  -  $\alpha$ Tocopheryl radical
- $\alpha TOO \cdot$  -  $\alpha$ Tocopheroxyl radical
- $Asc \cdot$  - Ascorbyl radical
- $Gs \cdot$  - Thiyl radical
